# Supplementary material
Source: HighWire-hosted journal article supplement (https://jnm.snmjournals.org/highwire/filestream/94890/field_highwire_adjunct_files/0/167445_Supplemental_Data.pdf)
Supplement: 167445_Supplemental_Data.pdf [file 167445_Supplemental_Data.pdf]

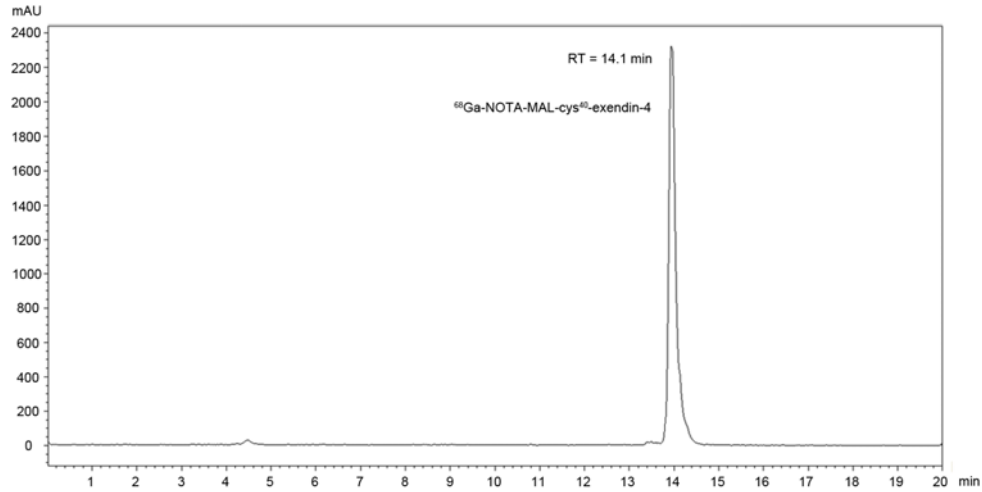

**Supplemental Figure 1.** HPLC radioactive chromatogram of the purified <sup>68</sup>Ga-NOTA-MAL-cys<sup>40</sup>-exendin-4 solution. The retention time was 14.1 min, with the radiochemical purity > 98% (Vydac 238TP54 C18 column). The gradient program started with 5/95 (v/v) acetonitrile/water at 0–5 min; was ramped to 80/20 (v/v) at 10 min and to 100/0 (v/v) at 15 min and kept until 18 min; and finally was ramped to 5/95 (v/v) at 20 min. Both eluents contain 0.1% TFA, and the flow rate was 1 mL/min.

Supplemental Table 1. Detailed MR Protocols

| Case no. | Equipment                    | MR protocols      |         |         |            | Contrast agents |                               |
|----------|------------------------------|-------------------|---------|---------|------------|-----------------|-------------------------------|
|          |                              | Sequences         | TR (ms) | TE (ms) | Slice (mm) |                 | Matrix                        |
| 1        | Symphony<br>1.5T, Siemens    | HASTE (FS)        | 1500    | 104     | 7.0        | 256*256         |                               |
|          |                              | EPI (b=1000)      | 5400    | 64      | 8.0        | 160*160         |                               |
|          |                              | VIBE              | 3.8     | 1.4     | 4.0        | 160*320         | Gd-DTPA (non-contrast/AP/PVP) |
| 2        | Signa Excite<br>1.5T, GE     | FSPGR (FS)        | 230     | 2.6     | 6.0        | 288*192         |                               |
|          |                              | FSE (non-FS/FS)   | 6667    | 102.3   | 6.0        | 288*224         |                               |
|          |                              | EPI (b=600)       | 1600    | 60.8    | 6.0        | 128*128         |                               |
|          |                              | 3D LAVA           | 3.3     | 1.5     | 5.0        | 288*160         | Gd-DTPA (non-contrast/AP/PVP) |
| 4        | Discovery MR<br>750 3.0T, GE | FFE (non-FS/FS)   | 210     | 3.5     | 6.0        | 188*288         |                               |
|          |                              | FRFSE (non-FS/FS) | 12857   | 74.4    | 6.0        | 288*288         |                               |
|          |                              | 3D LAVA           | 3.6     | 1.7     | 4.0        | 320*224         | Gd-DTPA (AP/PVP/DP)           |
| 6        | Signa HDxt<br>3.0T, GE       | FSPGR (FS)        | 200     | 4.7     | 8.0        | 288*160         |                               |
|          |                              | FSE (FS)          | 8571    | 85.2    | 7.0        | 288*224         |                               |
|          |                              | FIESTA            | 3.4     | 1.5     | 8.0        | 224*224         |                               |
|          |                              | 3D LAVA           | 3.6     | 1.7     | 5.0        | 288*200         | Gd-DTPA (non-contrast/AP/PVP) |
| 7        | Achieva 1.5T,                | TFE (non-FS)      | 10      | 4.6     | 7.0        | 256*224         |                               |

|    |                              |                 |       |       |     |         |                                   |
|----|------------------------------|-----------------|-------|-------|-----|---------|-----------------------------------|
|    | Philips                      | TSE (non-FS/FS) | 465   | 80    | 7.0 | 256*224 |                                   |
|    |                              | TFE             | 4.1   | 2.0   | 5.0 | 256*224 | Gd-DTPA (non-contrast/AP/PVP/DP)  |
| 9  | Discovery MR<br>750 3.0T, GE | FFE (non-FS/FS) | 187   | 3.9   | 7.0 | 188*288 |                                   |
|    |                              | FRFSE (FS)      | 9628  | 80.2  | 7.0 | 288*288 |                                   |
|    |                              | EPI (b=800)     | 6719  | 72.3  | 7.0 | 160*160 |                                   |
|    |                              | 3D LAVA         | 3.4   | 1.3   | 3.0 | 320*224 | Gd-DTPA (AP/PVP/DP)               |
| 13 | Discovery MR<br>750 3.0T, GE | FFE (non-FS/FS) | 205   | 4.1   | 6.0 | 188*288 | Not done                          |
|    |                              | FRFSE (FS)      | 10045 | 102   | 6.0 | 288*288 |                                   |
|    |                              | EPI (b=800)     | 7914  | 61.5  | 7.0 | 160*160 |                                   |
| 14 | Symphony<br>1.5T, Siemens    | GRE (FS)        | 191   | 5.3   | 6.0 | 285*380 | Gd-DTPA (non-contrast/AP/PVP/DP)  |
|    |                              | HASTE (FS)      | 1200  | 93    | 7.0 | 350*400 |                                   |
|    |                              | TrueFISP        | 4.3   | 2.1   | 6.0 | 256*256 |                                   |
|    |                              | TSE-MRCP        | 4500  | 984   | 5.0 | 320*320 |                                   |
| 15 | Discovery MR<br>750 3.0T, GE | FRFSE (FS)      | 11250 | 122.2 | 8.0 | 320*320 |                                   |
|    |                              | EPI (b=800)     | 8571  | 57.9  | 8.0 | 160*160 |                                   |
|    |                              | 3D LAVA         | 3.7   | 1.7   | 5.0 | 288*170 | Gd-DTPA (early AP/late AP/PVP/DP) |
| 17 | Signa HDxt<br>3.0T, GE       | FSPGR (non-FS)  | 140   | 4.5   | 6.0 | 288*170 |                                   |
|    |                              | FSE (FS)        | 8156  | 82.0  | 6.0 | 288*224 |                                   |
|    |                              | EPI (b=1000)    | 6500  | 69.4  | 7.0 | 96*130  |                                   |

|    |                              |                   |       |      |     |         |                                   |
|----|------------------------------|-------------------|-------|------|-----|---------|-----------------------------------|
|    |                              | 3D LAVA           | 3.7   | 1.6  | 4.0 | 320*224 | Gd-DTPA (early AP/late AP/PVP/DP) |
| 19 | Excite II                    | FFE (FS)          | 180   | 1.2  | 6.0 | 188*288 |                                   |
|    | Twinspeed                    | FSE (FS)          | 8057  | 80.2 | 6.0 | 288*288 |                                   |
|    | 1.5T, GE                     | 3D LAVA           | 3.6   | 1.7  | 4.0 | 320*224 | Gd-DTPA (early AP/late AP/PVP/DP) |
| 21 | Trio Tim 3.0T,<br>Siemens    | MPRAGE (non-FS)   | 1500  | 2.2  | 6.0 | 157*256 |                                   |
|    |                              | TSE (non-FS/FS)   | 2952  | 80   | 6.0 | 168*320 |                                   |
|    |                              | 3D-VIBE           | 3.4   | 1.3  | 4.0 | 168*320 | Gd-DTPA (AP/PVP)                  |
| 22 | Achieva 3.0 T,<br>Philips    | FFE (non-FS)      | 190   | 2.3  | 5.0 | 256*256 |                                   |
|    |                              | TSE (FS)          | 1957  | 80   | 5.0 | 256*256 |                                   |
|    |                              | EPI (DWI, b=1000) | 1895  | 56   | 5.0 | 124*192 |                                   |
|    |                              | THRIVE            | 3.0   | 1.4  | 5.0 | 236*256 | Gd-DTPA (early AP/late AP/PVP/DP) |
| 30 | Discovery MR<br>750 3.0T, GE | FFE (non-FS)      | 180   | 1.2  | 6.0 | 188*288 |                                   |
|    |                              | FRFSE (non-FS/FS) | 12857 | 74.4 | 6.0 | 288*288 |                                   |
|    |                              | 3D LAVA           | 3.9   | 1.7  | 4.0 | 320*224 | Gd-DTPA (early AP/late AP/PVP/DP) |
| 33 | Signa HDxt<br>3.0T, GE       | FSPGR (non-FS)    | 150   | 4.8  | 6.0 | 288*170 |                                   |
|    |                              | FSE (FS)          | 8571  | 88.0 | 6.0 | 288*224 |                                   |
|    |                              | EPI (b=600)       | 6000  | 65.6 | 6.0 | 96*130  |                                   |
|    |                              | 3D LAVA           | 4.1   | 1.9  | 6.0 | 288*200 | Gd-DTPA (non-contrast/AP/PVP/DP)  |
| 34 | Signa HDxt                   | FSPGR (non-FS)    | 200   | 4.7  | 6.0 | 288*170 | Not done                          |

|    |                        |                     |       |      |     |         |          |
|----|------------------------|---------------------|-------|------|-----|---------|----------|
|    | 3.0T, GE               | FSE (FS)            | 9105  | 81.0 | 6.0 | 288*224 |          |
|    |                        | EPI (b=800)         | 6500  | 61.4 | 6.0 | 96*130  |          |
| 35 | Skyra 3.0T,<br>Siemens | 3D-VIBE (non-FS/FS) | 4.1   | 1.3  | 3.0 | 309*380 | Not done |
|    |                        | TSE (non-FS/FS)     | 6725  | 81   | 4.0 | 330*330 |          |
|    |                        | EPI (b=800)         | 2700  | 68   | 4.0 | 148*250 |          |
| 36 | Skyra 3.0T,<br>Siemens | 3D-VIBE (non-FS/FS) | 4.1   | 1.3  | 3.0 | 309*380 | Not done |
|    |                        | TSE (FS)            | 8285  | 83   | 4.0 | 330*330 |          |
|    |                        | EPI (b=800)         | 2700  | 68   | 4.0 | 148*250 |          |
| 37 | Skyra 3.0T,<br>Siemens | 3D-VIBE (non-FS/FS) | 4.1   | 1.3  | 3.0 | 309*380 | Not done |
|    |                        | TSE (non-FS/FS)     | 9516  | 83   | 4.0 | 330*330 |          |
|    |                        | EPI (b=800)         | 2700  | 68   | 4.0 | 148*250 |          |
| 38 | Skyra 3.0T,<br>Siemens | 3D-VIBE (non-FS/FS) | 4.1   | 1.3  | 3.0 | 309*380 | Not done |
|    |                        | TSE (non-FS/FS)     | 5269  | 89   | 4.0 | 330*330 |          |
|    |                        | EPI (b=800)         | 2700  | 68   | 4.0 | 148*250 |          |
| 39 | Skyra 3.0T,<br>Siemens | 3D-VIBE (non-FS/FS) | 4.1   | 2.5  | 3.0 | 309*380 | Not done |
|    |                        | TSE (non-FS/FS)     | 9742  | 86   | 4.0 | 330*330 |          |
|    |                        | EPI (b=800)         | 2700  | 68   | 4.0 | 148*250 |          |
| 40 | Skyra 3.0T,<br>Siemens | 3D-VIBE (non-FS/FS) | 4.2   | 1.3  | 3.0 | 309*380 | Not done |
|    |                        | TSE (non-FS/FS)     | 10097 | 81   | 6.0 | 360*360 |          |

|    |                        |                     |      |     |     |         |          |
|----|------------------------|---------------------|------|-----|-----|---------|----------|
|    |                        | EPI (b=800)         | 2700 | 68  | 4.0 | 148*250 |          |
| 41 | Skyra 3.0T,<br>Siemens | 3D-VIBE (non-FS/FS) | 4.1  | 2.5 | 3.0 | 309*380 | Not done |
|    |                        | TSE (non-FS/FS)     | 9627 | 82  | 6.0 | 360*360 |          |
|    |                        | EPI (b=800)         | 2700 | 68  | 4.0 | 148*250 |          |
| 42 | Skyra 3.0T,<br>Siemens | 3D-VIBE (non-FS/FS) | 4.1  | 2.5 | 3.0 | 309*380 | Not done |
|    |                        | TSE (FS)            | 2792 | 81  | 6.0 | 360*360 |          |
|    |                        | EPI (b=800)         | 2700 | 68  | 4.0 | 148*250 |          |
| 43 | Skyra 3.0T,<br>Siemens | 3D-VIBE (non-FS/FS) | 4.1  | 2.5 | 3.0 | 309*380 | Not done |
|    |                        | TSE (FS)            | 8791 | 84  | 6.0 | 360*360 |          |
|    |                        | EPI (b=800)         | 2700 | 68  | 4.0 | 148*250 |          |

FS=fat suppression; AP=arterial phase; PVP=portal venous phase; DP=delay phase
